# Supplementary material
Source: MDPI journal article supplement (https://www.mdpi.com/2411-5142/5/4/100)
Supplement: s1 [file s1]

## Supplementary Tables

**Table S1.** Correlation with the composite score.

|                                                          | r   |
|----------------------------------------------------------|-----|
| ANT kicking leg                                          | .42 |
| ANT standing leg                                         | .48 |
| PM kicking leg                                           | .57 |
| PM standing leg                                          | .56 |
| PL kicking leg                                           | .48 |
| PL standing leg                                          | .40 |
| ANT = anterior; PM = posteromedial; PL = posterolateral; |     |

**Table S2.** Reliability analysis (Pre01, Pre02, Pre03).

|                                                                                                                                                                                                                          | ICC (3,1)         | SEM (SD $\times \sqrt{1-ICC}$ ) | CV (SD/mean) $\times 100$ |
|--------------------------------------------------------------------------------------------------------------------------------------------------------------------------------------------------------------------------|-------------------|---------------------------------|---------------------------|
| ANT                                                                                                                                                                                                                      | .96               |                                 |                           |
| kicking leg                                                                                                                                                                                                              | 95% CI [.94, .98] | 0.35                            | 3.05                      |
| ANT                                                                                                                                                                                                                      | .97               |                                 |                           |
| standing leg                                                                                                                                                                                                             | 95% CI [.95, .98] | 0.30                            | 2.65                      |
| PM                                                                                                                                                                                                                       | .95               |                                 |                           |
| kicking leg                                                                                                                                                                                                              | 95% CI [.93, .97] | 0.55                            | 2.54                      |
| PM                                                                                                                                                                                                                       | .93               |                                 |                           |
| standing leg                                                                                                                                                                                                             | 95% CI [.89, .96] | 0.77                            | 2.86                      |
| PL                                                                                                                                                                                                                       | .93               |                                 |                           |
| kicking leg                                                                                                                                                                                                              | 95% CI [.89, .96] | 0.71                            | 2.70                      |
| PL                                                                                                                                                                                                                       | .92               |                                 |                           |
| standing leg                                                                                                                                                                                                             | 95% CI [.88, .95] | 0.75                            | 2.66                      |
| ANT = anterior; CI = confidence interval; CV = coefficient of variation; ICC = intraclass correlation coefficient; PM = posteromedial; PL = posterolateral; SD = standard deviation; SEM = standard error of measurement |                   |                                 |                           |

**Table S3.** Mean normalized reach distances and normalized composite scores.

|                     |                                         | <b>pre03</b>  | <b>post01</b>  | <b>post02</b> | <b>post03</b> |
|---------------------|-----------------------------------------|---------------|----------------|---------------|---------------|
| ANT<br>kicking leg  | M ± SD                                  | 60.53 ± 6.48  | 56.22 ± 6.70   | 59.10 ± 5.77  | 60.23 ± 6.22  |
|                     | d <sub>z</sub> <sup>1</sup>             |               | -0.82          | 0.68          | 0.32          |
|                     | [95% CI]                                |               | [-1.20, -0.47] | [0.28, 0.99]  | [-0.02, 0.68] |
|                     | Average change <sup>2</sup><br>(M ± SD) |               | 4.32 ± 5.25    | 1.43 ± 3.75   | 0.31 ± 3.57   |
|                     | Change (%) <sup>2</sup>                 |               | -7.14          | -2.37         | -0.51         |
| ANT<br>standing leg | M ± SD                                  | 61.56 ± 6.34  | 57.62 ± 5.99   | 60.31 ± 6.00  | 60.53 ± 6.05  |
|                     | d <sub>z</sub> <sup>1</sup>             |               | -0.83          | 0.79          | 0.09          |
|                     | [95% CI]                                |               | [-1.17, -0.45] | [0.43, 1.15]  | [-0.26, 0.44] |
|                     | Average change <sup>2</sup><br>(M ± SD) |               | 3.94 ± 4.77    | 1.25 ± 3.18   | 1.03 ± 3.38   |
|                     | Change (%) <sup>2</sup>                 |               | -6.40          | -2.03         | -1.67         |
| PM<br>kicking leg   | M ± SD                                  | 103.27 ± 8.51 | 99.84 ± 9.45   | 100.88 ± 9.12 | 102.38 ± 8.43 |
|                     | d <sub>z</sub> <sup>1</sup>             |               | -0.50          | 0.17          | 0.39          |
|                     | [95% CI]                                |               | [-0.88, -0.17] | [-0.19, 0.51] | [0.02, 0.72]  |
|                     | Average change <sup>2</sup><br>(M ± SD) |               | 3.43 ± 6.97    | 2.39 ± 6.15   | 0.89 ± 4.58   |
|                     | Change (%) <sup>2</sup>                 |               | -3.32          | -2.32         | -0.86         |
| PM<br>standing leg  | M ± SD                                  | 104.74 ± 8.52 | 100.53 ± 9.32  | 101.75 ± 8.41 | 103.15 ± 8.50 |
|                     | d <sub>z</sub> <sup>1</sup>             |               | -0.61          | 0.23          | 0.30          |
|                     | [95% CI]                                |               | [-1.0, -0.29]  | [-0.12, 0.57] | [-0.04, 0.65] |
|                     | Average change <sup>2</sup><br>(M ± SD) |               | 4.21 ± 6.91    | 2.98 ± 5.85   | 1.58 ± 5.20   |
|                     | Change (%) <sup>2</sup>                 |               | -4.02          | -2.85         | -1.51         |
| PL<br>kicking leg   | M ± SD                                  | 101.97 ± 7.85 | 98.97 ± 8.66   | 100.55 ± 7.40 | 100.58 ± 9.37 |
|                     | d <sub>z</sub> <sup>1</sup>             |               | -0.38          | 0.26          | 0.01          |
|                     | [95% CI]                                |               | [-0.75, -0.05] | [-0.10, 0.59] | [-0.34, 0.35] |
|                     | Average change <sup>2</sup><br>(M ± SD) |               | 3.01 ± 7.84    | 1.43 ± 6.04   | 1.39 ± 6.44   |
|                     | Change (%) <sup>2</sup>                 |               | -2.95          | -1.40         | -1.37         |
| PL<br>standing leg  | M ± SD                                  | 102.04 ± 7.87 | 98.80 ± 7.51   | 99.19 ± 8.95  | 100.23 ± 8.26 |
|                     | d <sub>z</sub> <sup>1</sup>             |               | -0.44          | 0.07          | 0.21          |
|                     | [95% CI]                                |               | [-0.78, -0.08] | [-0.27, 0.43] | [-0.14, 0.55] |
|                     | Average change <sup>2</sup><br>(M ± SD) |               | 3.24 ± 7.33    | 2.85 ± 6.21   | 1.81 ± 5.47   |
|                     | Change (%) <sup>2</sup>                 |               | -3.18          | -2.80         | -1.77         |

Table S3. Continued.

|                                                                                                                                                                                                           |                                         | pre03        | post01         | post02       | post03        |
|-----------------------------------------------------------------------------------------------------------------------------------------------------------------------------------------------------------|-----------------------------------------|--------------|----------------|--------------|---------------|
| CS<br>kicking leg                                                                                                                                                                                         | M ± SD                                  | 88.66 ± 6.40 | 85.01 ± 7.28   | 86.84 ± 6.38 | 87.73 ± 6.64  |
|                                                                                                                                                                                                           | d <sub>z</sub> <sup>1</sup>             |              | -0.67          | 0.46         | 0.30          |
|                                                                                                                                                                                                           | [95% CI]                                |              | [-1.08, -0.36] | [0.08, 0.78] | [-0.04, 0.66] |
|                                                                                                                                                                                                           | Average change <sup>2</sup><br>(M ± SD) |              | 3.66 ± 5.49    | 1.82 ± 3.98  | 0.93 ± 3.56   |
|                                                                                                                                                                                                           | Change (%) <sup>2</sup>                 |              | -4.13          | -2.05        | -1.05         |
| CS<br>standing leg                                                                                                                                                                                        | M ± SD                                  | 89.43 ± 6.43 | 85.66 ± 6.48   | 87.08 ± 6.55 | 87.97 ± 6.44  |
|                                                                                                                                                                                                           | d <sub>z</sub> <sup>1</sup>             |              | -0.71          | 0.44         | 0.32          |
|                                                                                                                                                                                                           | [95% CI]                                |              | [-1.07, -0.35] | [0.09, 0.79] | [-0.04, 0.66] |
|                                                                                                                                                                                                           | Average change <sup>2</sup><br>(M ± SD) |              | 3.76 ± 5.33    | 2.35 ± 4.18  | 1.46 ± 3.68   |
|                                                                                                                                                                                                           | Change (%) <sup>2</sup>                 |              | -4.21          | -2.62        | -1.63         |
| ANT = anterior; CI = confidence interval; CS = composite score; PM = posteromedial; PL = posterolateral; pre03 = pre-load; post01 = 0 min post-load; post02 = 10 min post load; post03 = 20 min post load |                                         |              |                |              |               |

<sup>1</sup>compared to the previous point of time; <sup>2</sup>compared to pre03

**Table S4.** Results of the repeated measures ANOVA.

|                                                                               | <b>F (3, 189)</b>   | <b>p</b> | <b><math>\eta^2</math></b> | <b>1-<math>\beta</math></b> |
|-------------------------------------------------------------------------------|---------------------|----------|----------------------------|-----------------------------|
| Normalized values (%)                                                         | ANT<br>kicking leg  | 27.27    | < .001                     | .30                         |
|                                                                               | ANT<br>standing leg | 27.67    | < .001                     | .31                         |
|                                                                               | PM<br>kicking leg   | 9.11     | < .001                     | .13                         |
|                                                                               | PM<br>standing leg  | 13.36    | < .001                     | .18                         |
|                                                                               | PL<br>kicking leg   | 4.25     | .01                        | .06                         |
|                                                                               | PL<br>standing leg  | 7.61     | < .001                     | .11                         |
|                                                                               | CS<br>kicking leg   | 17.82    | < .001                     | .22                         |
|                                                                               | CS<br>standing leg  | 20.26    | < .001                     | .24                         |
| Side-difference anterior<br>(cm)                                              | 0.21                | .87      | < .01                      | .09                         |
| ANT = anterior; CS = composite score; PM = posteromedial, PL = posterolateral |                     |          |                            |                             |

|                                  |                     | Between        | F (1, 63)      | p      | $\eta_p^2$ | 1- $\beta$ |       |
|----------------------------------|---------------------|----------------|----------------|--------|------------|------------|-------|
| Normalized values (%)            | ANT<br>kicking leg  | Contrast 1     | Pre03 Post01   | 43.34  | < .001     | .41        | > .99 |
|                                  |                     | Contrast 2     | Post 01 Post02 | 28.87  | < .001     | .31        | > .99 |
|                                  |                     | Contrast 3     | Post02 Post03  | 6.39   | .01        | .09        | .70   |
|                                  |                     | Contrast 4     | Pre03 Post03   | 0.05   | .49        | .01        | .11   |
|                                  | ANT<br>standing leg | Contrast 1     | Pre03 Post01   | 43.68  | < .001     | .41        | > .99 |
|                                  |                     | Contrast 2     | Post 01 Post02 | 39.68  | < .001     | .09        | > .99 |
|                                  |                     | Contrast 3     | Post02 Post03  | 0.52   | .47        | .01        | .11   |
|                                  |                     | Contrast 4     | Pre03 Post03   | 5.92   | .02        | .09        | .67   |
|                                  | PM<br>kicking leg   | Contrast 1     | Pre03 Post01   | 15.48  | < .001     | .20        | .97   |
|                                  |                     | Contrast 2     | Post 01 Post02 | 1.73   | .19        | .03        | .25   |
|                                  |                     | Contrast 3     | Post02 Post03  | 9.38   | .003       | .13        | .85   |
|                                  |                     | Contrast 4     | Pre03 Post03   | 2.41   | .13        | .04        | .33   |
|                                  | PM<br>standing leg  | Contrast 1     | Pre03 Post01   | 23.69  | < .001     | .27        | > .99 |
|                                  |                     | Contrast 2     | Post 01 Post02 | 3.44   | .07        | .05        | .45   |
|                                  |                     | Contrast 3     | Post02 Post03  | 5.94   | .02        | .09        | .67   |
|                                  |                     | Contrast 4     | Pre03 Post03   | 5.95   | .02        | .09        | .67   |
|                                  | PL<br>kicking leg   | Contrast 1     | Pre03 Post01   | 9.43   | .003       | .13        | .86   |
|                                  |                     | Contrast 2     | Post 01 Post02 | 4.27   | .04        | .06        | .53   |
|                                  |                     | Contrast 3     | Post02 Post03  | < 0.01 | .97        | < .01      | .05   |
|                                  |                     | Contrast 4     | Pre03 Post03   | 3.00   | .09        | .05        | .40   |
| PL<br>standing leg               | Contrast 1          | Pre03 Post01   | 12.53          | .001   | .17        | .94        |       |
|                                  | Contrast 2          | Post 01 Post02 | 0.32           | .57    | .01        | .09        |       |
|                                  | Contrast 3          | Post02 Post03  | 2.93           | .04    | .04        | .39        |       |
|                                  | Contrast 4          | Pre03 Post03   | 6.98           | .01    | .10        | .74        |       |
| CS<br>kicking leg                | Contrast 1          | Pre03 Post01   | 28.44          | < .001 | .31        | > .99      |       |
|                                  | Contrast 2          | Post 01 Post02 | 13.17          | .001   | .17        | .95        |       |
|                                  | Contrast 3          | Post02 Post03  | 5.82           | .02    | .09        | .66        |       |
|                                  | Contrast 4          | Pre03 Post03   | 4.42           | .04    | .07        | .54        |       |
| CS standing<br>leg               | Contrast 1          | Pre03 Post01   | 31.92          | < .001 | .34        | > .99      |       |
|                                  | Contrast 2          | Post 01 Post02 | 12.23          | .001   | .16        | .93        |       |
|                                  | Contrast 3          | Post02 Post03  | 6.39           | .01    | .09        | .70        |       |
|                                  | Contrast 4          | Pre03 Post03   | 10.03          | .002   | .14        | .88        |       |
| Side-difference<br>anterior (cm) | Contrast 1          | Pre03 Post01   | < 0.01         | > .99  | < .01      | .05        |       |
|                                  | Contrast 2          | Post 01 Post02 | 0.30           | .59    | .01        | .08        |       |
|                                  | Contrast 3          | Post02 Post03  | 0.02           | .90    | < .01      | .05        |       |
|                                  | Contrast 4          | Pre03 Post03   | 0.40           | .53    | .01        | .10        |       |

ANT = anterior; CS = composite score; pre03 = pre-load; post01 = 0 min post-load; post02 = 10 min post load; post03 = 20 min post load
