# Supplementary material
Source: MDPI journal article supplement (https://www.mdpi.com/2411-5142/5/4/100)
Supplement: s1 [file s1]

## Supplementary Figures

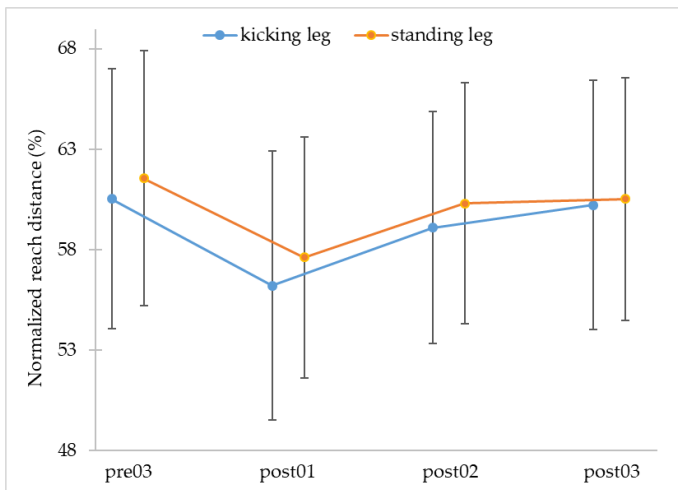

(a)

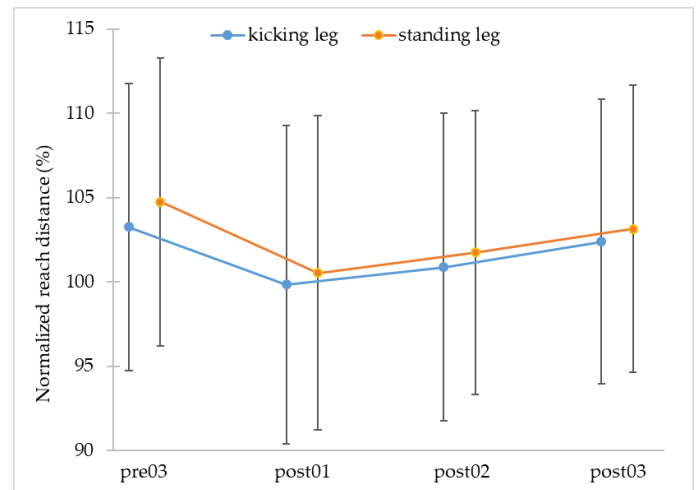

(b)

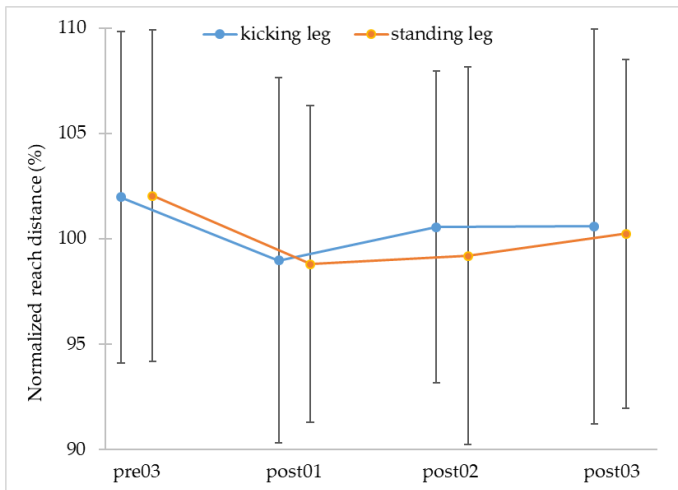

(c)

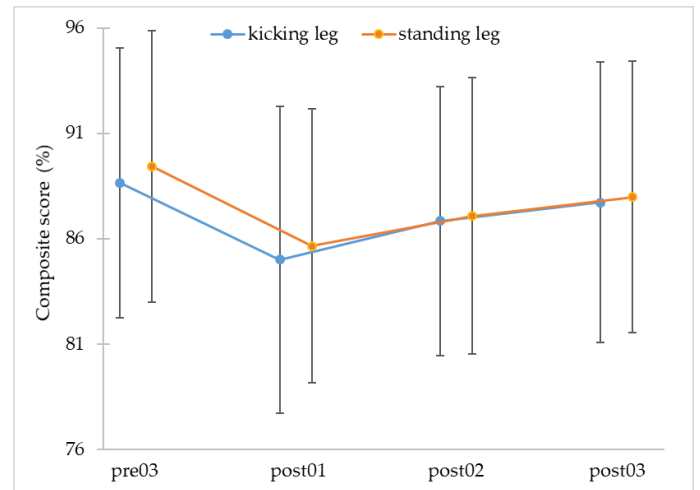

(d)

**Figure S1.** Mean normalized values and standard deviations (a) anterior, (b) posteromedial, (c) posterolateral and (d) composite scores at the four points of time (pre03 = pre-load; post01 = 0 min post-load; post02 = 10 min post-load; post03 = 20 min post-load).

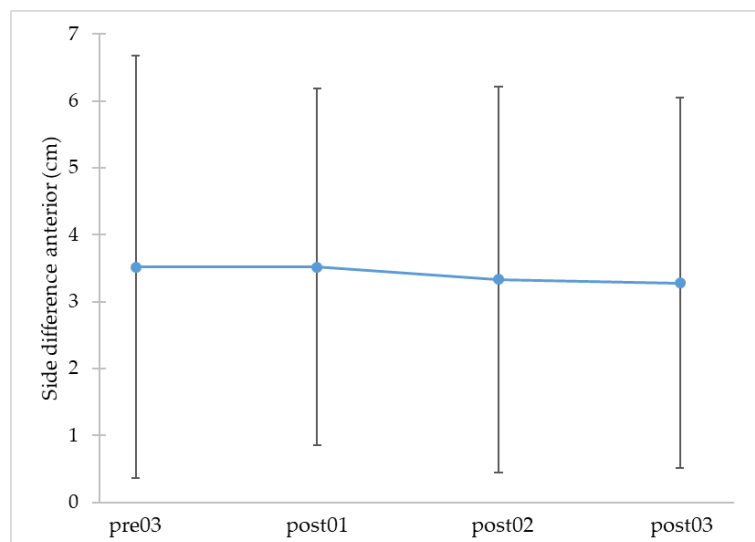

**Figure S2.** Mean side-differences anterior and standard deviation at the four points of time (pre03 = pre-load; post01 = 0 min post-load; post02 = 10 min post-load; post03 = 20 min post-load).
